# Supplementary material for: The FEeding Support Team (FEST) randomised, controlled feasibility trial of proactive and reactive telephone support for breastfeeding women living in disadvantaged areas
Source: HighWire-hosted journal article supplement (doi:10.1136/bmjopen-2011-000652), 2012-01-01
Supplement: bmjopen-2011-000652-s1.pdf [file bmjopen-2011-000652-s1.pdf]

**Table S1. Breastfeeding rates at hospital discharge obtained from the Scottish Morbidity Record 02 (SMR02) submitted by maternity hospitals to the Information and Statistics Division, NHS Scotland (<http://www.isdscotland.org/isd/1018.html>)\***

|                          | SIMD Scotland Quintiles |        |       |        |       |        |       |        |       |        |       |        |
|--------------------------|-------------------------|--------|-------|--------|-------|--------|-------|--------|-------|--------|-------|--------|
|                          | 5                       |        | 4     |        | 3     |        | 2     |        | 1     |        | Total |        |
|                          | Count                   | %      | Count | %      | Count | %      | Count | %      | Count | %      | Count | %      |
| Breast Only              | 1083                    | 63.0%  | 990   | 57.0%  | 639   | 50.4%  | 374   | 47.0%  | 247   | 39.0%  | 3333  | 54.2%  |
| Formula Only             | 394                     | 22.9%  | 508   | 29.3%  | 461   | 36.4%  | 309   | 38.9%  | 264   | 41.6%  | 1936  | 31.5%  |
| Not Applicable           | 6                       | 0.3%   | 7     | 0.4%   | 9     | 0.7%   | 2     | 0.3%   | 3     | 0.5%   | 27    | 0.4%   |
| Mixed (Breast & Formula) | 116                     | 6.8%   | 118   | 6.8%   | 60    | 4.7%   | 40    | 5.0%   | 44    | 6.9%   | 378   | 6.1%   |
| Other                    | 8                       | 0.5%   | 6     | 0.3%   | 6     | 0.5%   | 3     | 0.4%   | 5     | 0.8%   | 28    | 0.5%   |
| Not Known                | 111                     | 6.5%   | 107   | 6.2%   | 93    | 7.3%   | 67    | 8.4%   | 71    | 11.2%  | 449   | 7.3%   |
| Total                    | 1718                    | 100.0% | 1736  | 100.0% | 1268  | 100.0% | 795   | 100.0% | 634   | 100.0% | 6151  | 100.0% |

\* We have reported SIMD as it is described on the SIMD website, with SIMD 1 representing the most disadvantaged postcode areas and SIMD 5 representing the most advantaged areas. Please note that historically there has been inconsistency in reproducing SIMD results in breastfeeding statistics, with many reports using the SIMD scale in the opposite direction.

**Table S2. Detailed costs of alternative intervention scenarios: extended FEST team hours**

|                                                  | <b>Scenario 1 - Feeding team 1pm - 8pm - all time with trial women, 365 days per year (£)</b> | <b>Scenario 2 – standard working hours (8am - 8pm), 365 days per year (£)</b> | <b>Scenario 3 - 24 hour service, 365 days per year (£)</b> |
|--------------------------------------------------|-----------------------------------------------------------------------------------------------|-------------------------------------------------------------------------------|------------------------------------------------------------|
| <b>Band 4 Staff (one staff member full time)</b> | <b>per annum</b>                                                                              | <b>per annum</b>                                                              | <b>per annum</b>                                           |
| Social hours worked                              | 1,184.75                                                                                      | 1,132.75                                                                      | 425.55                                                     |
| Pay rate                                         | 12.22                                                                                         | 12.22                                                                         | 12.22                                                      |
| <i>Cost social</i>                               | 14,477.65                                                                                     | 13,842.21                                                                     | 5,200.22                                                   |
| Night shift / Saturday hours worked              | 182.00                                                                                        | 208.00                                                                        | 873.60                                                     |
| Pay rate premium                                 | 0.30                                                                                          | 0.30                                                                          | 0.30                                                       |
| Pay rate                                         | 15.89                                                                                         | 15.89                                                                         | 15.89                                                      |
| Sunday hours worked                              | 182.00                                                                                        | 208.00                                                                        | 249.60                                                     |
| Pay rate premium                                 | 0.60                                                                                          | 0.60                                                                          | 0.60                                                       |
| Pay rate                                         | 19.55                                                                                         | 19.55                                                                         | 19.55                                                      |
| <i>Cost anti social</i>                          | 6,449.72                                                                                      | 7,371.10                                                                      | 18,758.19                                                  |
| <b>Total Band 4 Staff</b>                        | <b>20,927.36</b>                                                                              | <b>21,213.31</b>                                                              | <b>23,958.41</b>                                           |
| <b>Band 7 midwife one staff member full time</b> |                                                                                               |                                                                               |                                                            |
| Hours worked                                     | 1,548.75                                                                                      | 1,548.75                                                                      | 1,548.75                                                   |
| Pay rate                                         | 21.78                                                                                         | 21.78                                                                         | 21.78                                                      |
| <i>Cost social</i>                               | 33,731.78                                                                                     | 33,731.78                                                                     | 33,731.78                                                  |
| Night shift / Saturday hours worked              | 0.00                                                                                          | 0.00                                                                          | 0.00                                                       |
| Pay rate premium                                 | 0.30                                                                                          | 0.30                                                                          | 0.30                                                       |
| Pay rate                                         | 28.31                                                                                         | 28.31                                                                         | 28.31                                                      |
| Sunday hours worked                              | 0.00                                                                                          | 0.00                                                                          | 0.00                                                       |
| Pay rate premium                                 | 0.60                                                                                          | 0.60                                                                          | 0.60                                                       |
| Pay rate                                         | 34.85                                                                                         | 34.85                                                                         | 34.85                                                      |
| <i>Cost anti social</i>                          | 0.00                                                                                          | 0.00                                                                          | 0.00                                                       |
| <b>Total Band 7 midwife</b>                      | <b>33,731.78</b>                                                                              | <b>33,731.78</b>                                                              | <b>33,731.78</b>                                           |
| <b>Team members</b>                              |                                                                                               |                                                                               |                                                            |
| Band 4                                           | 2                                                                                             | 3                                                                             | 5                                                          |
| Band 7 (no weekend or night duties)              | 1                                                                                             | 1                                                                             | 1                                                          |
| <b>TOTAL ANNUAL COST OF EACH SCENARIO</b>        | <b>£75,586.50</b>                                                                             | <b>£97,371.70</b>                                                             | <b>£153,523.82</b>                                         |

**Table S3. Detailed costs of alternative interventions: staff resources for band 5 (newly qualified midwives) and band 7 midwife**

|                                                                    | <b>Scenario 1 - Feeding team 1pm - 8pm - all time with trial women, 365 days per year (£)</b> | <b>Scenario 2 - standard working hours (8am - 8pm), 365 days per year (£)</b> | <b>Scenario 3 - 24 hour service, 365 days per year (£)</b> |
|--------------------------------------------------------------------|-----------------------------------------------------------------------------------------------|-------------------------------------------------------------------------------|------------------------------------------------------------|
| <b>Band 5 newly qualified midwife (one staff member full time)</b> | <b>per annum</b>                                                                              | <b>per annum</b>                                                              | <b>per annum</b>                                           |
| Social hours worked                                                | 1,184.75                                                                                      | 1,132.75                                                                      | 425.55                                                     |
| Pay rate                                                           | 13.00                                                                                         | 13.00                                                                         | 13.00                                                      |
| <i>Cost social</i>                                                 | <i>15,401.75</i>                                                                              | <i>14,725.75</i>                                                              | <i>5,532.15</i>                                            |
| Night shift / Saturday hours worked                                | 182.00                                                                                        | 208.00                                                                        | 873.60                                                     |
| Pay rate premium                                                   | 0.30                                                                                          | 0.30                                                                          | 0.30                                                       |
| Pay rate                                                           | 16.90                                                                                         | 16.90                                                                         | 16.90                                                      |
| Sunday hours worked                                                | 182.00                                                                                        | 208.00                                                                        | 249.60                                                     |
| Pay rate premium                                                   | 0.60                                                                                          | 0.60                                                                          | 0.60                                                       |
| Pay rate                                                           | 20.80                                                                                         | 20.80                                                                         | 20.80                                                      |
| <i>Cost anti social</i>                                            | <i>6,861.40</i>                                                                               | <i>7,841.60</i>                                                               | <i>19,955.52</i>                                           |
| <b>Total Band 5 newly qualified midwife</b>                        | <b>22,263.15</b>                                                                              | <b>22,567.35</b>                                                              | <b>25,487.67</b>                                           |
| <b>Band 7 midwife (one staff member full time)</b>                 |                                                                                               |                                                                               |                                                            |
| Hours worked                                                       | 1,548.75                                                                                      | 1,548.75                                                                      | 1,548.75                                                   |
| Pay rate                                                           | 21.78                                                                                         | 21.78                                                                         | 21.78                                                      |
| <i>Cost social</i>                                                 | <i>33,731.78</i>                                                                              | <i>33,731.78</i>                                                              | <i>33,731.78</i>                                           |
| Night shift / Saturday hours worked                                | 0.00                                                                                          | 0.00                                                                          | 0.00                                                       |
| Pay rate premium                                                   | 0.30                                                                                          | 0.30                                                                          | 0.30                                                       |
| Pay rate                                                           | 28.31                                                                                         | 28.31                                                                         | 28.31                                                      |
| Sunday hours worked                                                | 0.00                                                                                          | 0.00                                                                          | 0.00                                                       |
| Pay rate premium                                                   | 0.60                                                                                          | 0.60                                                                          | 0.60                                                       |
| Pay rate                                                           | 34.85                                                                                         | 34.85                                                                         | 34.85                                                      |
| <i>Cost anti social</i>                                            | <i>0.00</i>                                                                                   | <i>0.00</i>                                                                   | <i>0.00</i>                                                |
| <b>Total Band 7 midwife</b>                                        | <b>33,731.78</b>                                                                              | <b>33,731.78</b>                                                              | <b>33,731.78</b>                                           |
| <b>Team members</b>                                                |                                                                                               |                                                                               |                                                            |
| Band 5                                                             | 2                                                                                             | 3                                                                             | 5                                                          |
| Band 7 (no weekend or night duties)                                | 1                                                                                             | 1                                                                             | 1                                                          |
| <b>TOTAL ANNUAL COST OF EACH SCENARIO</b>                          | <b>£78,258.08</b>                                                                             | <b>£101,433.83</b>                                                            | <b>£161,170.13</b>                                         |
